# Supplementary material for: Complex translocation disrupting TCF4 and altering TCF4 isoform expression segregates as mild autosomal dominant intellectual disability
Source: PubMed Central journal article supplement (PMC4868023; doi:10.1186/s13023-016-0439-6), 2016-05-14
Supplement: 13023_2016_439_MOESM1_ESM.pdf [file 13023_2016_439_MOESM1_ESM.pdf]

**Complex Balanced Translocation Disrupting *TCF4* and Altering *TCF4* Isoform  
Expression Segregates as Mild Autosomal Dominant Intellectual Disability**

Valerie Maduro<sup>1</sup>, Barbara Pusey<sup>1</sup>, Praveen F. Cherukuri<sup>1</sup>, Paul Atkins<sup>2,3</sup>, Christèle du Souich<sup>2,3</sup>, Rosemarie Rupperts<sup>2,3</sup>, Marjolaine Limbos<sup>4</sup>, David R. Adams<sup>1</sup>, Samarth S. Bhatt<sup>5</sup>, David Chai<sup>6</sup>, Patrice Eydoux<sup>6</sup>, Anna Lehman<sup>2,3</sup>, Amanda E. Links<sup>1</sup>, May C. Malicdan<sup>1</sup>, Christopher E. Mason<sup>7</sup>, Marie Morimoto<sup>2,3</sup>, James C. Mullikin<sup>8</sup>, Andrew Sear<sup>9</sup>, Clara Van Karnebeek<sup>3</sup>, Pawel Stankiewicz<sup>5</sup>, William A. Gahl<sup>1, 10</sup>, Camilo Toro<sup>1</sup>, Cornelius F. Boerkoel<sup>1,2,3</sup>

<sup>1</sup>NIH Undiagnosed Diseases Program, Common Fund, Office of the Director, NIH, National Institutes of Health, Bethesda, Maryland, USA

<sup>2</sup>Department of Medical Genetics, <sup>3</sup>Child and Family Research Institute, University of British Columbia, Vancouver, Canada

<sup>4</sup>Sunny Hill Health Centre for Children, Vancouver, Canada.

<sup>5</sup>Department of Molecular and Human Genetics, Baylor College of Medicine, Houston, USA

<sup>6</sup>Department of Pathology and Laboratory Medicine, University of British Columbia, Vancouver, British Columbia, Canada.

<sup>7</sup>Institute for Computational Biomedicine, Weill Cornell Medical College, Department of Physiology and Biophysics, New York, NY 10021

<sup>8</sup>NIH Intramural Sequencing Center, National Human Genome Research Institute, NIH, Bethesda, Maryland, USA

<sup>9</sup>Department of General Practice, Faculty of Medicine, University of British Columbia,  
Vancouver, British Columbia, Canada

<sup>10</sup>NHGRI, National Institutes of Health, Bethesda, MD USA

Abstract: 219 words

Text: 5,608

**Corresponding author:**

Cornelius F. Boerkoel, M.D., Ph.D.  
University of British Columbia  
Department of Medical Genetics  
Children's and Women's Health Centre of BC  
4500 Oak St., Rm., C234  
Vancouver, B.C. V6H 3N1  
Canada  
Phone: 604-875-2157  
Fax: 604-875-2376  
Email: [cboerkoel@gmail.com](mailto:cboerkoel@gmail.com)

## SUPPLEMENTARY METHODS

### Analysis of gene expression on chromosomes 14 and 18

The Pearson correlation coefficient of gene expression on chromosomes 14 and 18 was calculated using all-possible pairs ( $N^2$ ) resulting from a window of 3 genes to derive matrix  $M$ .  $M$  is symmetric; therefore, correlation values  $M_{i,j}=M_{j,i}$ . Values in  $M$  range from -1 to +1, where -1 occurs when gene expression values are anti-correlated and +1 when their expression patterns are correlated.

The comparison is between two conditions A, and B; A is the normal control fibroblast gene expression data, and B is individual II-1 fibroblast gene expression data. Values for gene expression are FPKM values derived from RNASeq data. A window was defined as adjacent genes along the same chromosome. All genes in a window were treated as a vector, and the correlation coefficient was calculated as follows, e.g., window of 3. Window range = {1,NumberOfTotalGenes (chromosome)}:

Window of three genes in two different conditions

$$A=a_1, a_2, a_3$$

$$B=b_1, b_2, b_3$$

Vector average calculation:

$$\bar{a}_i = \frac{1}{w} \sum_{k=0}^{w-1} a_{i+k} \quad [\text{e.g.: } \bar{a} = (a_1 + a_2 + a_3)/3]$$

$$\bar{b}_i = \frac{1}{w} \sum_{k=0}^{w-1} b_{i+k} \quad [\text{e.g.: } \bar{b} = (b_1 + b_2 + b_3)/3]$$

Deviation from the mean

$$\bar{A} = (a_1 - \bar{a}, a_2 - \bar{a}, a_3 - \bar{a})$$

$$\bar{B} = (b_1 - \bar{b}, b_2 - \bar{b}, b_3 - \bar{b})$$

Calculate Pearson correlation coefficient (PCC) for each gene at position p

$$PCC = \frac{\bar{A} \cdot \bar{B}}{EucD_A * EucD_B}$$

Where,

$$\bar{A} \cdot \bar{B} = \sum_{k=0}^{w-1} (a_k - \bar{a})(b_k - \bar{b})$$

$$EucD_A = \sqrt{\sum_{k=0}^{w-1} (a_k - \bar{a})^2}$$

$$EucD_B = \sqrt{\sum_{k=0}^{w-1} (b_k - \bar{b})^2}$$

## SUPPLEMENTARY TABLES

**Supplementary Table 1.** Read summary statistics of whole-genome sequencing on Illumina HiSeq 2000 (>Q20). See attached excel file.

**Supplementary Table 2.** CASAVA human reference sequence (hg19) coverage summary of whole genome library. See attached excel file.

**Supplementary Table 3.** Summary statistics of homozygous and heterozygous single nucleotide variants (>Q20) detected in whole-genome sequencing.

| <b>Chromosome</b> | <b>Hom</b>       | <b>Het</b>       | <b>HetNonRef</b> | <b>Total(Hom,Het)</b> | <b>Het-Hom-Ratio</b> |
|-------------------|------------------|------------------|------------------|-----------------------|----------------------|
| chr1              | 114,372          | 170,990          | 122              | 285,362               | 1.49503375           |
| chr2              | 116,706          | 180,975          | 94               | 297,681               | 1.550691481          |
| chr3              | 95,962           | 154,014          | 81               | 249,976               | 1.604947792          |
| chr4              | 109,890          | 158,219          | 138              | 268,109               | 1.43979434           |
| chr5              | 81,931           | 143,658          | 72               | 225,589               | 1.753402253          |
| chr6              | 84,378           | 152,063          | 107              | 236,441               | 1.802164071          |
| chr7              | 78,386           | 127,937          | 70               | 206,323               | 1.632140944          |
| chrX              | 73,785           | 7,234            | 27               | 81,019                | 0.098041607          |
| chr8              | 74,595           | 118,256          | 91               | 192,851               | 1.585307326          |
| chr9              | 59,963           | 96,305           | 83               | 156,268               | 1.606073745          |
| chr10             | 71,624           | 109,301          | 61               | 180,925               | 1.526038758          |
| chr11             | 73,860           | 112,252          | 80               | 186,112               | 1.519794205          |
| chr12             | 66,278           | 103,879          | 55               | 170,157               | 1.56732249           |
| chr13             | 61,146           | 81,180           | 41               | 142,326               | 1.327642037          |
| <b>chr14</b>      | <b>48,230</b>    | <b>68,465</b>    | <b>40</b>        | <b>116,695</b>        | <b>1.419552146</b>   |
| chr15             | 44,528           | 64,492           | 43               | 109,020               | 1.448347107          |
| chr16             | 42,095           | 73,528           | 45               | 115,623               | 1.746715762          |
| chr17             | 36,542           | 65,022           | 28               | 101,564               | 1.779377155          |
| <b>chr18</b>      | <b>42,863</b>    | <b>63,732</b>    | <b>50</b>        | <b>106,595</b>        | <b>1.486876794</b>   |
| chr20             | 26,467           | 51,907           | 22               | 78,374                | 1.961196962          |
| chrY              | 1,084            | 4,646            | 8                | 5,730                 | 4.28597786           |
| chr19             | 28,162           | 50,215           | 29               | 78,377                | 1.783076486          |
| chr22             | 16,578           | 31,750           | 19               | 48,328                | 1.915188804          |
| chr21             | 20,557           | 37,784           | 28               | 58,341                | 1.838011383          |
| <b>All Chrom</b>  | <b>1,469,982</b> | <b>2,227,804</b> | <b>1,434</b>     | <b>3,697,786</b>      | <b>1.515531483</b>   |
| <b>Autosomes</b>  | <b>1,395,113</b> | <b>2,215,924</b> | <b>1,399</b>     | <b>3,611,037</b>      | <b>1.588347324</b>   |
| <b>chrM</b>       | <b>36</b>        | <b>1</b>         | <b>0</b>         | <b>37</b>             | <b>0.027777778</b>   |

**Supplementary Table 4.** Sequences of oligos used for amplifying breakpoints from genomic DNA

| <b>Primer Name</b>  | <b>Sequence</b>              |
|---------------------|------------------------------|
| junct-1a 18-14F     | GAAGGCTGGTACCAAGGAAAGC       |
| junct-1a 18-14R     | CCAAGAAGTTTATAGTCCAATCCTGGTG |
| junct-2a 18-14 F    | AAATAGATTGGGCTCAGTGGGATTC    |
| junct-2a 18-14 R    | CCAACACACACACCATTAGGGAGAT    |
| IntraChromFusion_1F | ACCATGTGAAAGTCAGATTTTTATT    |
| IntraChromFusion_1R | CCCATGTCATACATGTCAAGATT      |

**Supplementary Table 5.** Sequences of Oligos used for RT-PCR and qRT-PCR

| <b>Primer Name</b>         | <b>Sequence</b>           | <b>RT-PCR</b> | <b>qRT-PCR</b> |
|----------------------------|---------------------------|---------------|----------------|
| TCF4v2RevCompF             | GCAAGTGGACATTTTACTGGC     |               | X              |
| TCF4v2LongFormA2R          | GCTGGTCATGTGGTCATAGG      |               | X              |
| NM_001243234ShortFormF     | GGCGGCAACTCTTTGATGTA      |               | X              |
| NM_001243234ShortFormR     | TAGGGAAAGTGCTGGTTGCT      |               | X              |
| IntraChromFusion_1F        | ACCATGTGAAAGTCAGATTTTTATT | X             |                |
| IntraChromFusion_1R        | CCCATGTCATACATGTCAAGATT   | X             |                |
| Fusion1aPLEKHG3ex1TCF4ex4F | CCCCTCAGAGAGCGACTTT       | X             |                |
| Fusion1aPLEKHG3ex1TCF4ex4R | CATAGGGAGTCCCATCTCCA      | X             |                |

**Supplementary Table 6.** Nanostring probes

| Gene        | Accession      | Transcript Target Region | Target Sequence                                                                                                                                                                                                                                      | Transcript variants detected | Chromosome 18 (hg19) |          | RefSeq Transcript ID                                                                                                                                                                                 |
|-------------|----------------|--------------------------|------------------------------------------------------------------------------------------------------------------------------------------------------------------------------------------------------------------------------------------------------|------------------------------|----------------------|----------|------------------------------------------------------------------------------------------------------------------------------------------------------------------------------------------------------|
|             |                |                          |                                                                                                                                                                                                                                                      |                              | Start                | Stop     |                                                                                                                                                                                                      |
| <i>TCF4</i> | NM_001083962.1 | 3136-3235                | TTAGGGGAAGCTCGGCT<br>GCCCTAGTAACAAAACC<br>AGCAAACGTCCTGATGA<br>CAACGAAGTGATGACAT<br>TAGCCATTCCTTAGGGTA<br>GGAGGAACAGATGG                                                                                                                             | 1-12                         | 52894659             | 52894758 | NM_001243236,<br>NM_001243235,<br>NM_001243234,<br>NM_001243232,<br>NM_001243233,<br>NM_001243231,<br>NM_001083962,<br>NM_003199,<br>NM_001243230,<br>NM_001243228,<br>NM_001243227,<br>NM_001243226 |
| <i>TCF4</i> | NM_001083962.1 | 854-953                  | CCAGCAGGGACCTTGGG<br>TCACATGACAATCTCTCT<br>CCACCTTTTGTCAATTCC<br>AGAATACAAAGTAAAAC<br>AGAAAGGGGCTCATACT<br>CATCTTATGGGAG<br>CTCAGGACATTGTAACAT<br>GCACTTGGGTTGAGAACT<br>GCTACTCGAGCTTCTCCA<br>GGAGGCCCTTGGAGCAA<br>ATGTTTTGTAAACACCAA<br>TCTAAGAACAT | 1-7                          | 53070713             | 53128312 | NM_001243226,<br>NM_001243231,<br>NM_001243230,<br>NM_001243228,<br>NM_001243227,<br>NM_003199,<br>NM_001083962                                                                                      |
| <i>TCF4</i> | NM_001243226.1 | 188-287                  | AGCCCGCAGTTCCCGGAT<br>GTGAATGGATTACAATGT<br>ATCTTTCAGGGAAACCTA<br>TTATTATCAATGTGACTC<br>CACGGGGGAGTCCATGG<br>TGATGATGATG<br>CTGAACTGTTCAGGCTTC                                                                                                       | 3                            | 53298588             | 53303001 | NM_001243226                                                                                                                                                                                         |
| <i>TCF4</i> | NM_001243227.1 | 13-112                   | AGATTGTAAGTACGATC<br>TGAGGAAAAATGAGATG                                                                                                                                                                                                               | 4 & 5                        | 53256934             | 53257033 | NM_001243228,<br>NM_001243227                                                                                                                                                                        |
| <i>TCF4</i> | NM_001243230.1 | 111-210                  | TTAGGGGAAGCTCGGCT<br>GCCCTAGTAACAAAACC<br>AGCAAACGTCCTGATGA<br>CAACGAAGTGATGACAT<br>TAGCCATTCCTTAGGGTA<br>GGAGGAACAGATGG                                                                                                                             | 6                            | 53252534             | 53255750 | NM_001243230                                                                                                                                                                                         |

|             |                |         |                                                                                                                                                                                                                                                                                                                                                                                                                                                                                                                                                                                                                                                                                                                                                                                            |         |          |          |                               |
|-------------|----------------|---------|--------------------------------------------------------------------------------------------------------------------------------------------------------------------------------------------------------------------------------------------------------------------------------------------------------------------------------------------------------------------------------------------------------------------------------------------------------------------------------------------------------------------------------------------------------------------------------------------------------------------------------------------------------------------------------------------------------------------------------------------------------------------------------------------|---------|----------|----------|-------------------------------|
| <i>TCF4</i> | NM_001243231.1 | 150-249 | AGTGGGAAAAATGGACC<br>AACTTCTTTGGC<br>GGAATTTATTACTTCCTA<br>TTCATATGGAAGAGGAC<br>AGCAGAGATGTAGAAGA<br>CAGAAGTAGCTCAGGGT<br>CCTGGGGGAATGGAGGA<br>CATCCAAGCCCGTC<br>TTAGAGAAAGTGGAGGC<br>CATTGGAATGACAGTTTT<br>TGGAAGTGTGGAGCAGT<br>TTGGCTAAGAATAGGAA<br>TGAAGGATATTTTTTCC<br>AGTTTATCATAGC<br>CCACATGCTTTTTGGCGA<br>CTCTTCATCACGTATTTG<br>GGCTTAGATCTTCTGGTG<br>CCTCCCTCGGCGTGCTAC<br>CCATAAGGTCGAAAGAA<br>AAGTAAAACAG<br>GAAAAAAGAATCCGAGA<br>CCATGTACTGCGCATACA<br>CAATCCCGGGCATGGGC<br>GGCAACTCTTTGATGTAC<br>TACTATAATGGGAAAGC<br>GGTCTATGCTCCA<br>CATGTCTGACCAATCAGC<br>AAACAACACCACAGGAT<br>GAAATTTAAACAATGCA<br>GATGCTCAGATACAGGG<br>CTATGTTGCCTGGACCAC<br>GAAGGGAAAAGCAG<br>CTGAACTGTTCAAGGCTTC<br>AGATTGTAAGTACGATC<br>TGAGGAAAAATGAGGTG<br>CTCGATGAATTTTCGTTT<br>GTATTTTTTGGCGAGGCG | 7       | 53131311 | 53177851 | NM_001243231                  |
| <i>TCF4</i> | NM_001243232.1 | 214-313 | TGGAAGTGTGGAGCAGT<br>TTGGCTAAGAATAGGAA<br>TGAAGGATATTTTTTCC<br>AGTTTATCATAGC<br>CCACATGCTTTTTGGCGA<br>CTCTTCATCACGTATTTG<br>GGCTTAGATCTTCTGGTG<br>CCTCCCTCGGCGTGCTAC<br>CCATAAGGTCGAAAGAA<br>AAGTAAAACAG<br>GAAAAAAGAATCCGAGA<br>CCATGTACTGCGCATACA<br>CAATCCCGGGCATGGGC<br>GGCAACTCTTTGATGTAC<br>TACTATAATGGGAAAGC<br>GGTCTATGCTCCA<br>CATGTCTGACCAATCAGC<br>AAACAACACCACAGGAT<br>GAAATTTAAACAATGCA<br>GATGCTCAGATACAGGG<br>CTATGTTGCCTGGACCAC<br>GAAGGGAAAAGCAG<br>CTGAACTGTTCAAGGCTTC<br>AGATTGTAAGTACGATC<br>TGAGGAAAAATGAGGTG<br>CTCGATGAATTTTCGTTT<br>GTATTTTTTGGCGAGGCG                                                                                                                                                                                                             | 8       | 53070914 | 53071013 | NM_001243232.1                |
| <i>TCF4</i> | NM_001243233.1 | 223-314 | AGTGGGAAAAATGGACC<br>AACTTCTTTGGC<br>GGAATTTATTACTTCCTA<br>TTCATATGGAAGAGGAC<br>AGCAGAGATGTAGAAGA<br>CAGAAGTAGCTCAGGGT<br>CCTGGGGGAATGGAGGA<br>CATCCAAGCCCGTC<br>TTAGAGAAAGTGGAGGC<br>CATTGGAATGACAGTTTT<br>TGGAAGTGTGGAGCAGT<br>TTGGCTAAGAATAGGAA<br>TGAAGGATATTTTTTCC<br>AGTTTATCATAGC<br>CCACATGCTTTTTGGCGA<br>CTCTTCATCACGTATTTG<br>GGCTTAGATCTTCTGGTG<br>CCTCCCTCGGCGTGCTAC<br>CCATAAGGTCGAAAGAA<br>AAGTAAAACAG<br>GAAAAAAGAATCCGAGA<br>CCATGTACTGCGCATACA<br>CAATCCCGGGCATGGGC<br>GGCAACTCTTTGATGTAC<br>TACTATAATGGGAAAGC<br>GGTCTATGCTCCA<br>CATGTCTGACCAATCAGC<br>AAACAACACCACAGGAT<br>GAAATTTAAACAATGCA<br>GATGCTCAGATACAGGG<br>CTATGTTGCCTGGACCAC<br>GAAGGGAAAAGCAG<br>CTGAACTGTTCAAGGCTTC<br>AGATTGTAAGTACGATC<br>TGAGGAAAAATGAGGTG<br>CTCGATGAATTTTCGTTT<br>GTATTTTTTGGCGAGGCG | 9       | 53089410 | 53089501 | NM_001243233                  |
| <i>TCF4</i> | NM_001243235.1 | 103-192 | AGTGGGAAAAATGGACC<br>AACTTCTTTGGC<br>GGAATTTATTACTTCCTA<br>TTCATATGGAAGAGGAC<br>AGCAGAGATGTAGAAGA<br>CAGAAGTAGCTCAGGGT<br>CCTGGGGGAATGGAGGA<br>CATCCAAGCCCGTC<br>TTAGAGAAAGTGGAGGC<br>CATTGGAATGACAGTTTT<br>TGGAAGTGTGGAGCAGT<br>TTGGCTAAGAATAGGAA<br>TGAAGGATATTTTTTCC<br>AGTTTATCATAGC<br>CCACATGCTTTTTGGCGA<br>CTCTTCATCACGTATTTG<br>GGCTTAGATCTTCTGGTG<br>CCTCCCTCGGCGTGCTAC<br>CCATAAGGTCGAAAGAA<br>AAGTAAAACAG<br>GAAAAAAGAATCCGAGA<br>CCATGTACTGCGCATACA<br>CAATCCCGGGCATGGGC<br>GGCAACTCTTTGATGTAC<br>TACTATAATGGGAAAGC<br>GGTCTATGCTCCA<br>CATGTCTGACCAATCAGC<br>AAACAACACCACAGGAT<br>GAAATTTAAACAATGCA<br>GATGCTCAGATACAGGG<br>CTATGTTGCCTGGACCAC<br>GAAGGGAAAAGCAG<br>CTGAACTGTTCAAGGCTTC<br>AGATTGTAAGTACGATC<br>TGAGGAAAAATGAGGTG<br>CTCGATGAATTTTCGTTT<br>GTATTTTTTGGCGAGGCG | 10 & 11 | 52988899 | 52988988 | NM_001243235,<br>NM_001243234 |
| <i>TCF4</i> | NM_001243236.1 | 105-204 | AGTGGGAAAAATGGACC<br>AACTTCTTTGGC<br>GGAATTTATTACTTCCTA<br>TTCATATGGAAGAGGAC<br>AGCAGAGATGTAGAAGA<br>CAGAAGTAGCTCAGGGT<br>CCTGGGGGAATGGAGGA<br>CATCCAAGCCCGTC<br>TTAGAGAAAGTGGAGGC<br>CATTGGAATGACAGTTTT<br>TGGAAGTGTGGAGCAGT<br>TTGGCTAAGAATAGGAA<br>TGAAGGATATTTTTTCC<br>AGTTTATCATAGC<br>CCACATGCTTTTTGGCGA<br>CTCTTCATCACGTATTTG<br>GGCTTAGATCTTCTGGTG<br>CCTCCCTCGGCGTGCTAC<br>CCATAAGGTCGAAAGAA<br>AAGTAAAACAG<br>GAAAAAAGAATCCGAGA<br>CCATGTACTGCGCATACA<br>CAATCCCGGGCATGGGC<br>GGCAACTCTTTGATGTAC<br>TACTATAATGGGAAAGC<br>GGTCTATGCTCCA<br>CATGTCTGACCAATCAGC<br>AAACAACACCACAGGAT<br>GAAATTTAAACAATGCA<br>GATGCTCAGATACAGGG<br>CTATGTTGCCTGGACCAC<br>GAAGGGAAAAGCAG<br>CTGAACTGTTCAAGGCTTC<br>AGATTGTAAGTACGATC<br>TGAGGAAAAATGAGGTG<br>CTCGATGAATTTTCGTTT<br>GTATTTTTTGGCGAGGCG | 12      | 52969649 | 52969748 | NM_001243236                  |
| <i>TCF4</i> | NM_003199.2    | 111-210 | AGTGGGAAAAATGGACC<br>AACTTCTTTGGC<br>GGAATTTATTACTTCCTA<br>TTCATATGGAAGAGGAC<br>AGCAGAGATGTAGAAGA<br>CAGAAGTAGCTCAGGGT<br>CCTGGGGGAATGGAGGA<br>CATCCAAGCCCGTC<br>TTAGAGAAAGTGGAGGC<br>CATTGGAATGACAGTTTT<br>TGGAAGTGTGGAGCAGT<br>TTGGCTAAGAATAGGAA<br>TGAAGGATATTTTTTCC<br>AGTTTATCATAGC<br>CCACATGCTTTTTGGCGA<br>CTCTTCATCACGTATTTG<br>GGCTTAGATCTTCTGGTG<br>CCTCCCTCGGCGTGCTAC<br>CCATAAGGTCGAAAGAA<br>AAGTAAAACAG<br>GAAAAAAGAATCCGAGA<br>CCATGTACTGCGCATACA<br>CAATCCCGGGCATGGGC<br>GGCAACTCTTTGATGTAC<br>TACTATAATGGGAAAGC<br>GGTCTATGCTCCA<br>CATGTCTGACCAATCAGC<br>AAACAACACCACAGGAT<br>GAAATTTAAACAATGCA<br>GATGCTCAGATACAGGG<br>CTATGTTGCCTGGACCAC<br>GAAGGGAAAAGCAG<br>CTGAACTGTTCAAGGCTTC<br>AGATTGTAAGTACGATC<br>TGAGGAAAAATGAGGTG<br>CTCGATGAATTTTCGTTT<br>GTATTTTTTGGCGAGGCG | 1 & 2   | 53255651 | 53255750 | NM_003199,<br>NM_001083962    |



*GAPD*  
*H* NM\_002046.3 973-1072  
GGGGAGGTGTT  
CACTCCTCCACCTTTGAC  
GCTGGGGCTGGCATTGCC  
CTCAACGACCACTTTGTC  
AAGCTCATTTCCTGGTAT  
GACAACGAATTTGGCTAC  
AGCAACAGGG

---

## SUPPLEMENTARY FIGURES

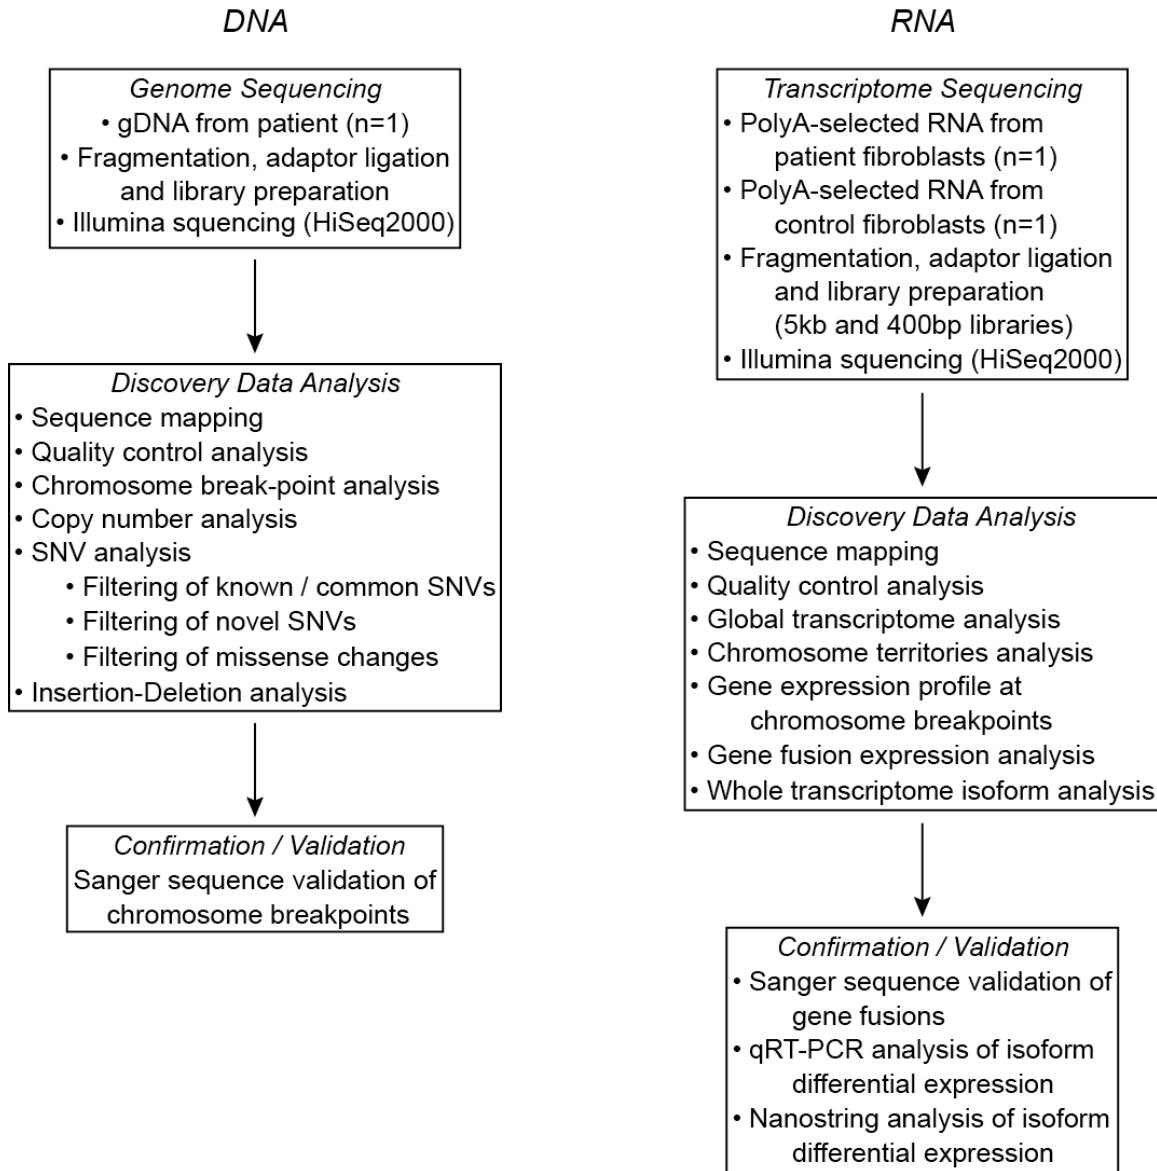

**Supplementary Figure 1.** Experimental design of next-generation sequencing analysis of the whole-genome and whole-transcriptome of patient (and corresponding control data). Schematic overview of comprehensive analysis of patient genome and transcriptome data to identify and discover disease-causing genes, and unravel their relative gene expression patterns. Genomic DNA was extracted from blood, and total RNA for polyA-selected RNASeq analysis was extracted from skin fibroblast cells of patient and control normal cells.

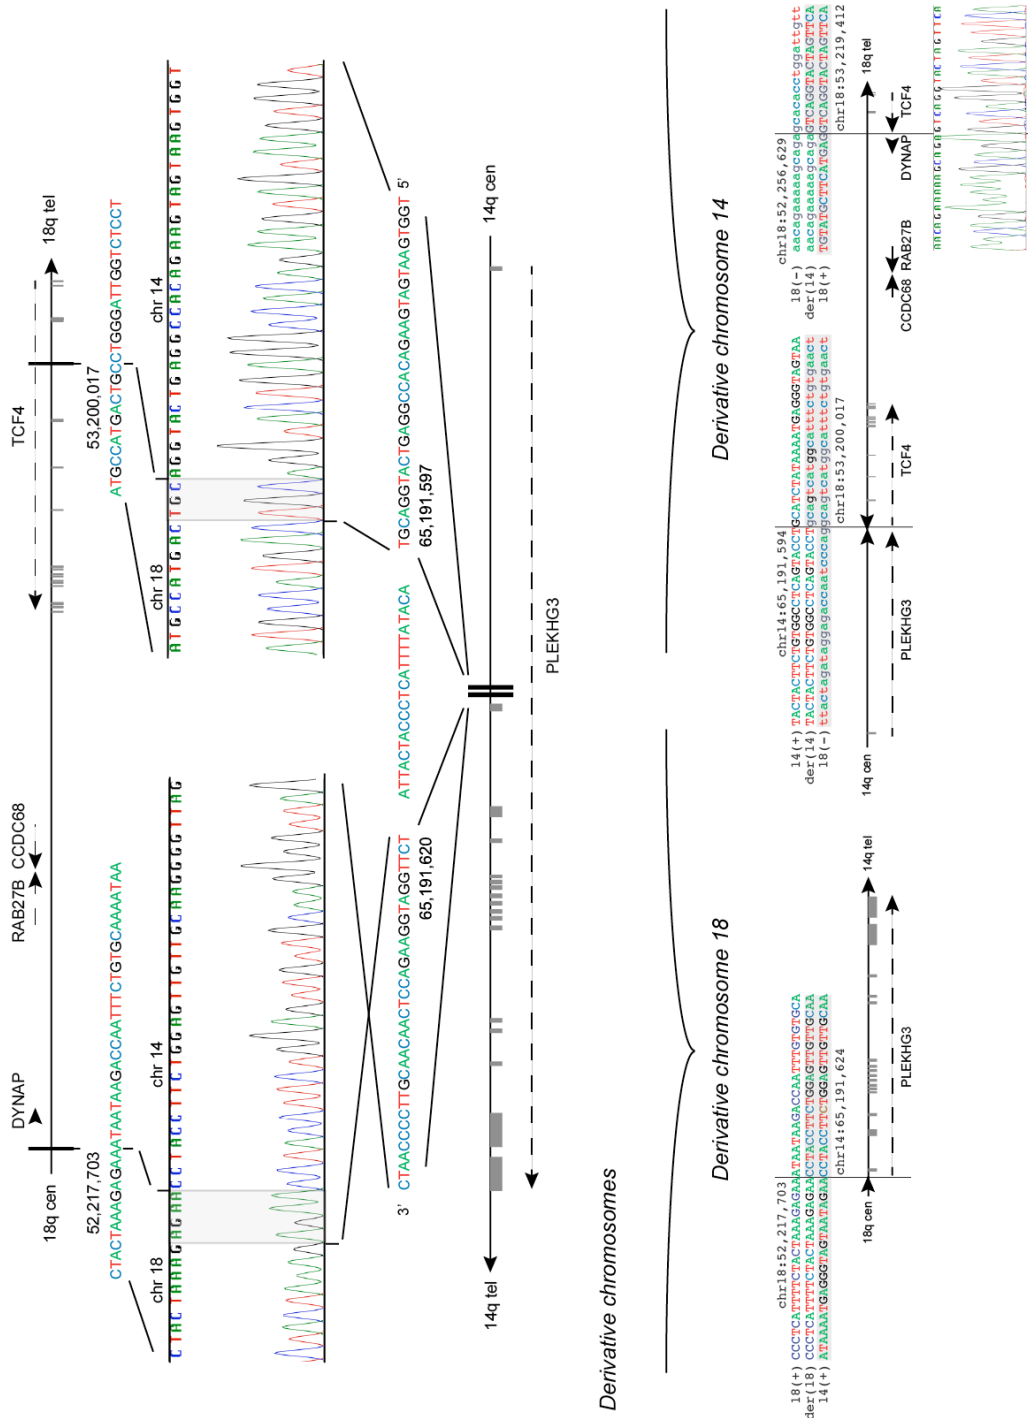

**Supplementary Figure 2.** Diagram of the chromosome 14 and 18 breakpoints and chromatograms showing the sequence across the breakpoint junctions. Note that chromosome 18 has two breakpoints and an inversion to give rise to the two derivative chromosomes. All numbering of physical positions is in hg19. Note that each junction is associated with a deletion as described in the text. The joining of the double strand chromosome 14 and 18 breaks likely occurred by microhomology; the regions of

microhomology are highlighted in gray.

A

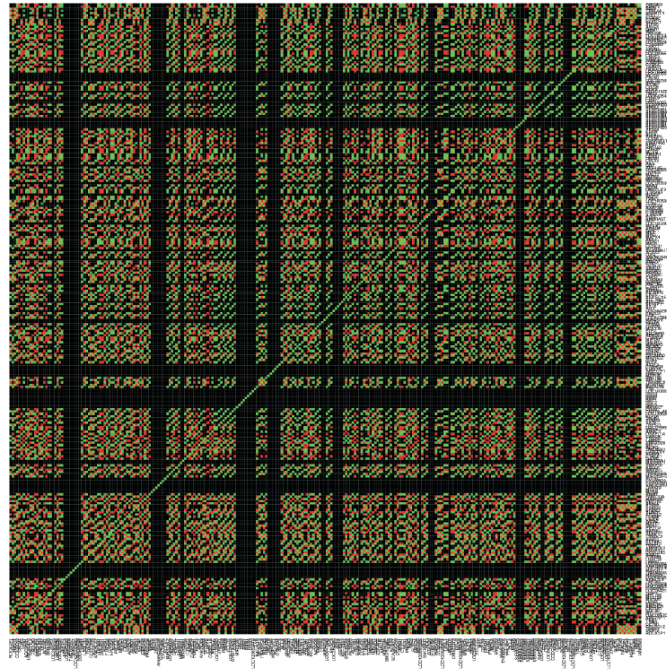

B

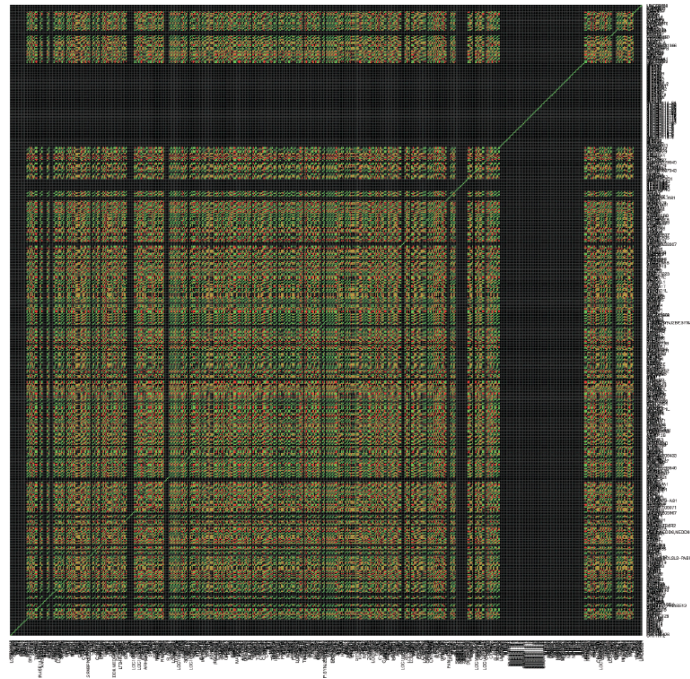

**Supplementary Figure 3.** Pearson correlation-coefficient matrices for all pairs of genes on chromosome 18 (A) and chromosome 14 (B). Using  $M_{i,j} = M_{j,i} = 1$  for positive correlation and  $M_{i,j} = M_{j,i} = -1$  for anti-correlation of gene-expression, the topological overlap along the diagonal did not identify signatures of anti-correlation along the entire length of chromosomes 18 and 14. This suggests that alterations in gene expression are not a result of changes in chromatin territory for each derivative chromosome.

A

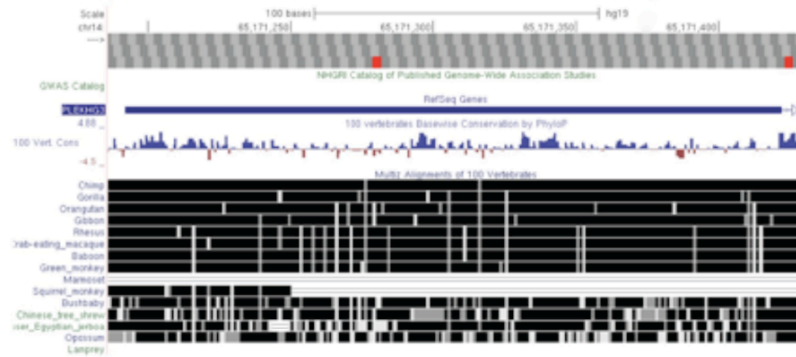

B

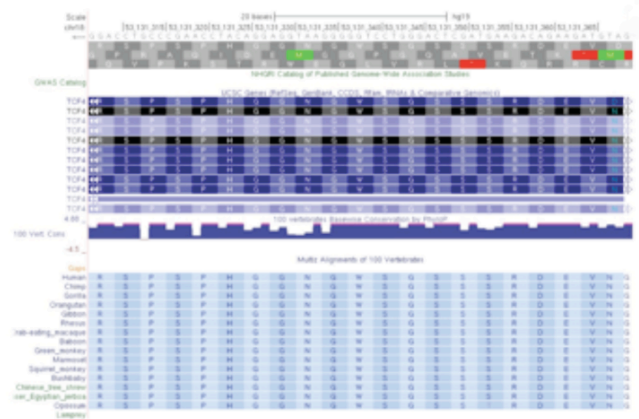

C

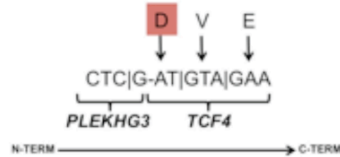

D

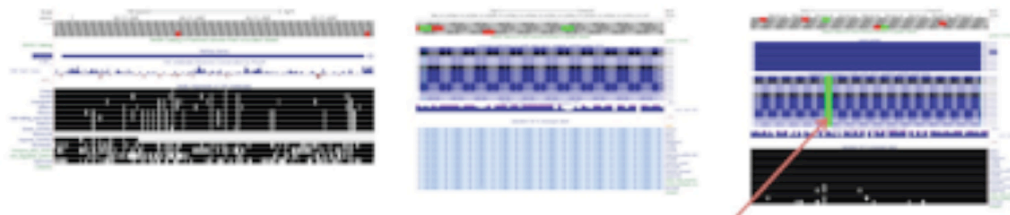

**Supplementary Figure 4.** Evaluation of exons of *PLEKHG3* (exon 1; UTR) and *TCF4* (exon4; coding) potential for coding a gene fusion product. (A) Exon 1 of *PLEKHG3* which is a 5' untranslated region (UTR); shown here are all three protein coding frames, and non of these three show a methionine (green). (B) Exon 4 of *TCF4* which codes for

protein sequence (*top frame*); however it does not have a Methionine. (C) This panel shows a hypothetical scenario where an Aspartate (*D*) would be substituted at the junction (instead of a highly conserved Asparagine (*N*) in case exon4 is translated in the fusion product. There is evidence for the amino acid Methionine in exon5 of TCF4 that could lead to a potential short-isoform of TCF4. (D) This is a hypothetical depiction of the fusion gene product originating in exon5 of TCF4 giving rise to a shorter version of TCF4 instead of the original longer forms of TCF4.
